# Supplementary material for: Turn-off/on fluorescent sensors for Cu2+ and ATP in aqueous solution based on a tetraphenylethylene derivative
Source: Royal Society of Chemistry journal article supplement (doi:10.1039/c8tc06075d), 2019-01-01
Supplement: c8tc06075d1.pdf [file c8tc06075d1.pdf]

Supporting Information for  
Turn-off/on fluorescent sensors for Cu<sup>2+</sup> and ATP in aqueous  
solution based on tetraphenylethylene derivative

Lai-Yao Geng,<sup>a</sup> Yang Zhao,<sup>a</sup> Edward Kamyra,<sup>a</sup> Jin-Tang Guo,<sup>a</sup> Bin Sun,<sup>b</sup> Ya-Kai Feng,<sup>a</sup> Mei-Fang  
Zhu,<sup>b</sup> Xiang-Kui Ren,<sup>\*,a</sup>

<sup>a</sup> School of Chemical Engineering and Technology, Tianjin University, Tianjin 300350, P. R. China

<sup>b</sup> State Key Laboratory for Modification of Chemical Fibers and Polymer Materials, College of  
Materials Science and Engineering, Donghua University, Shanghai 201620, P. R. China

\*Corresponding Author: renxiangkui@tju.edu.cn

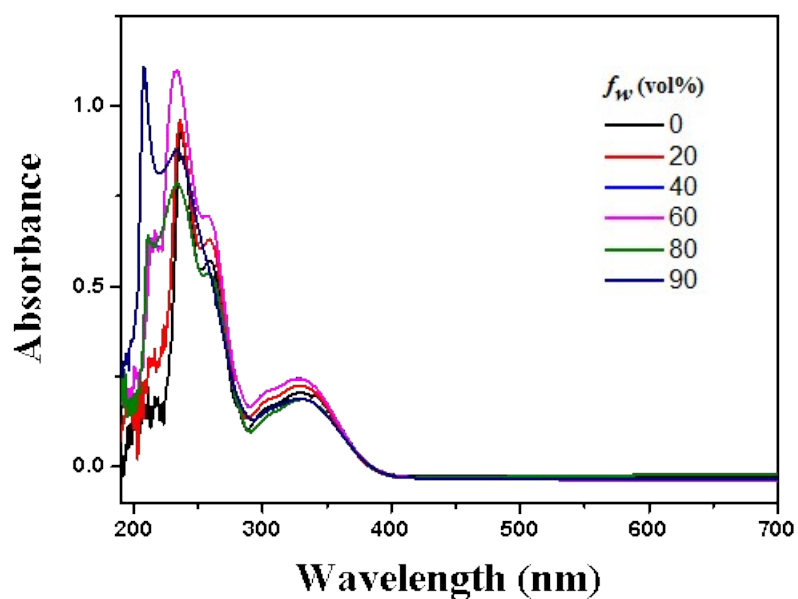

**Fig. S1.** UV/Vis spectra of TPE-COOH in different H<sub>2</sub>O/EtOH mixtures from 0% to 90%. [TPE-COOH] =  $1.0 \times 10^{-5}$  mol/L.

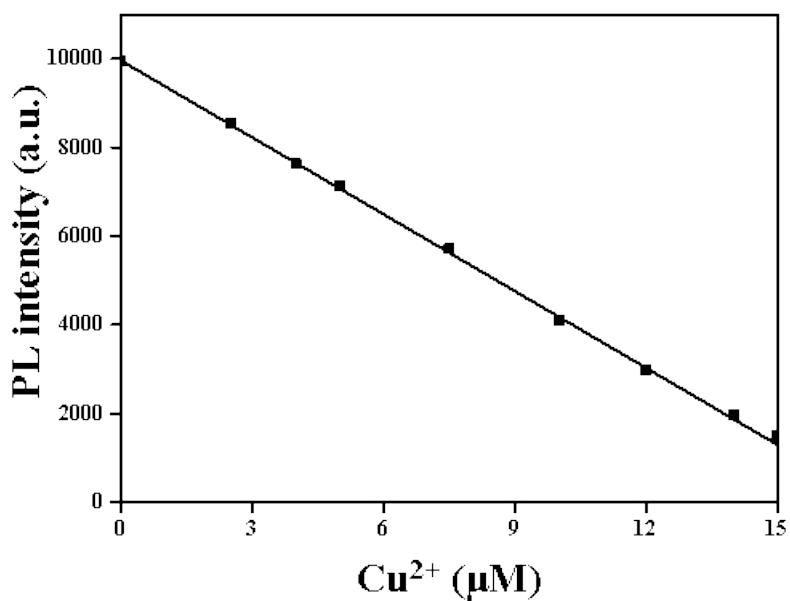

**Fig. S2.** Linear curve between maximum emission intensity of TPE-COOH and the Cu<sup>2+</sup> concentration in HEPES buffer.

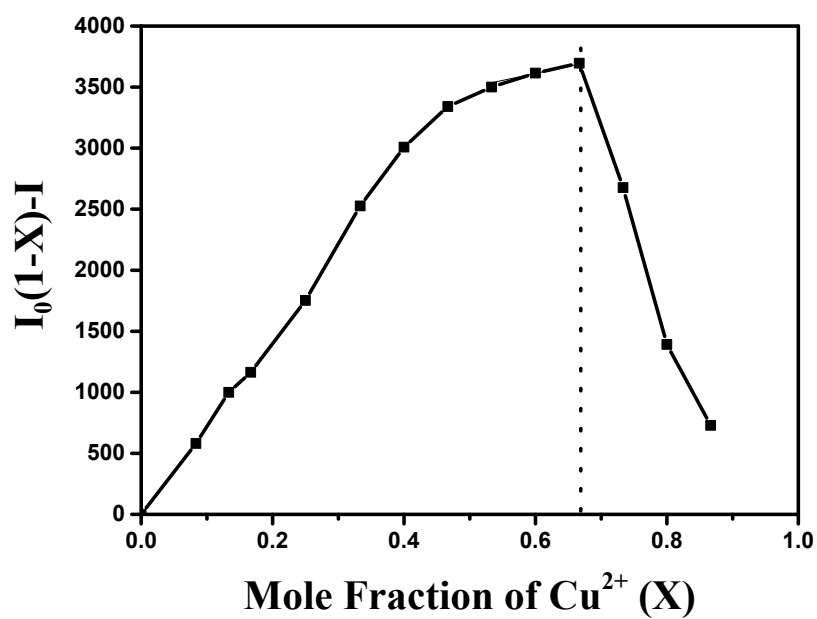

**Fig. S3.** Job's plot for determining the binding ratio of TPE-COOH to  $\text{Cu}^{2+}$  in HEPES buffer (10 mM, pH 7.4). The total concentration of TPE-COOH and  $\text{Cu}^{2+}$  ion is 20  $\mu\text{M}$ .

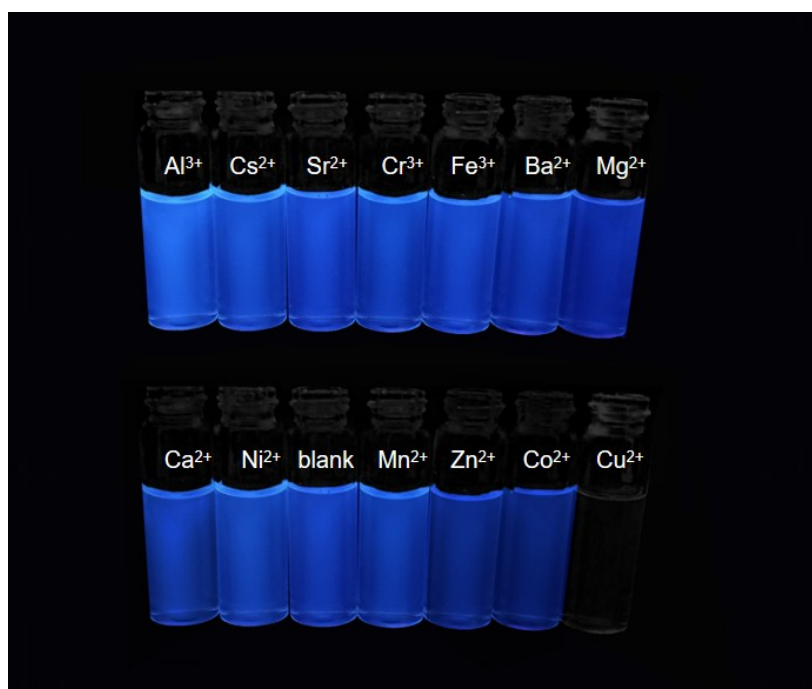

**Fig. S4.** Photos of TPE-COOH upon addition of various metal ions in HEPES buffer.  $[\text{TPE-COOH}] = 1.0 \times 10^{-5}$  mol/L;  $[\text{metal}] = 2.0 \times 10^{-5}$  mol/L;  $\lambda_{\text{exc}} = 365$  nm.

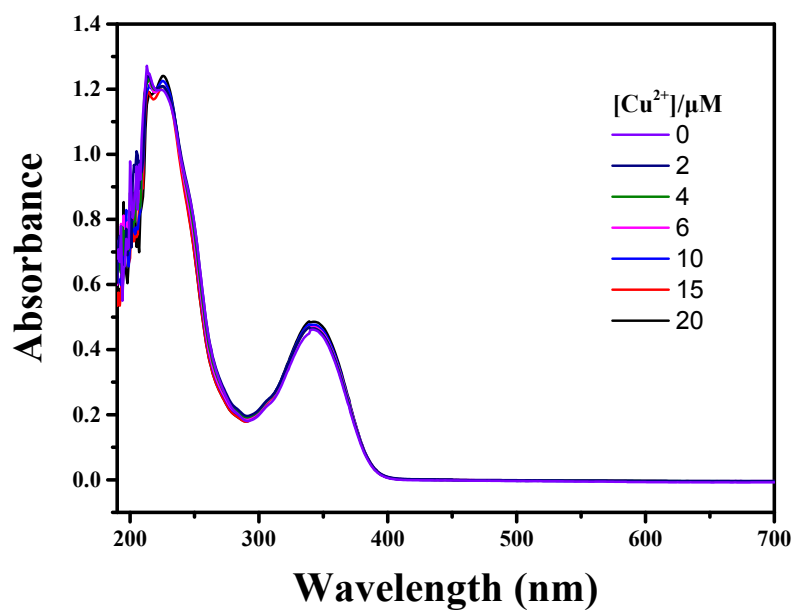

**Fig. S5.** UV/Vis spectra of TPE-COOH upon introduction of different amounts of  $\text{Cu}^{2+}$  in HEPES buffer (10 mM, pH 7.4).  $[\text{TPE-COOH}] = 1.0 \times 10^{-5}$  mol/L.

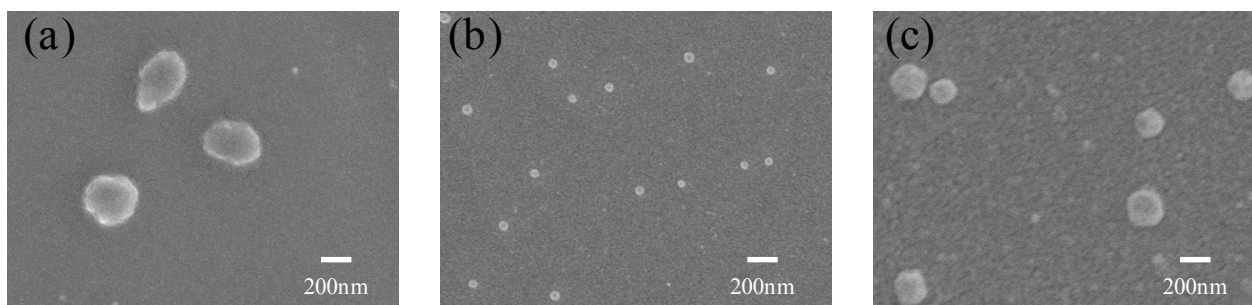

**Fig. S6.** Scanning electron microscope photographs of aggregates: (a) TPE-COOH; (b) TPE-COOH/ $\text{Cu}^{2+}$  and (c) TPE-COOH/ $\text{Cu}^{2+}$ -ATP.

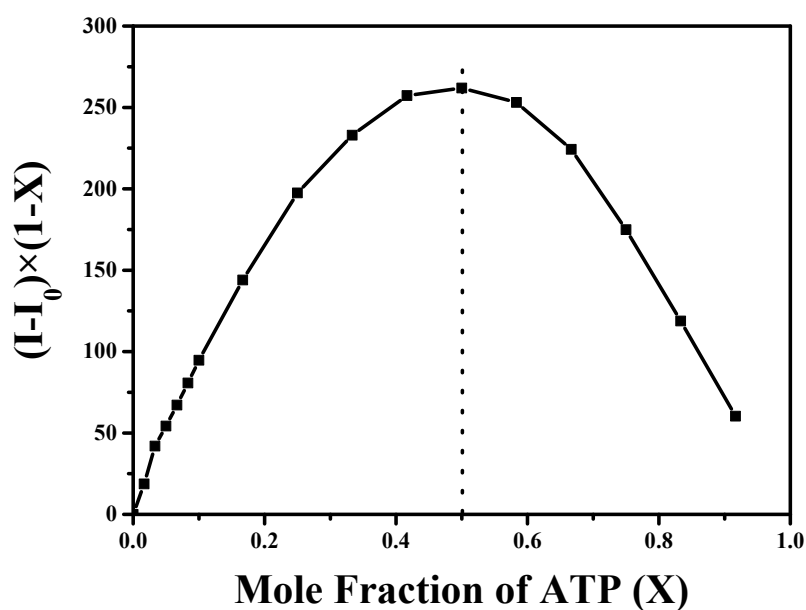

**Fig. S7.** Job's plot for determining the binding ratio of TPE-COOH/Cu<sup>2+</sup> to ATP in HEPES buffer (10 mM, pH 7.4). The total concentration of TPE-COOH/Cu<sup>2+</sup> and ATP is 20 μM.

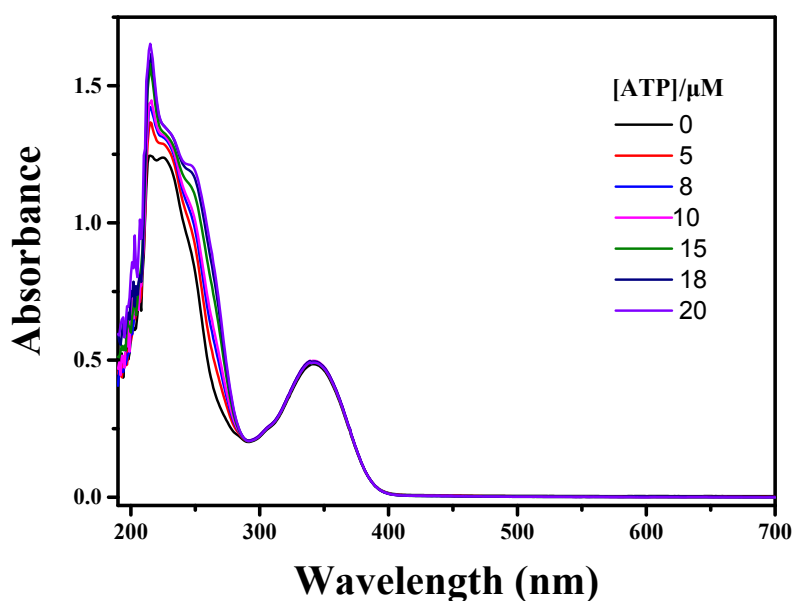

**Fig. S8.** UV/Vis spectra of TPE-COOH/Cu<sup>2+</sup> upon introduction of different amounts of ATP in HEPES buffer (10 mM, pH 7.4). [TPE-COOH] = 1.0 × 10<sup>-5</sup> mol/L; [Cu<sup>2+</sup>] = 2.0 × 10<sup>-5</sup> mol/L.

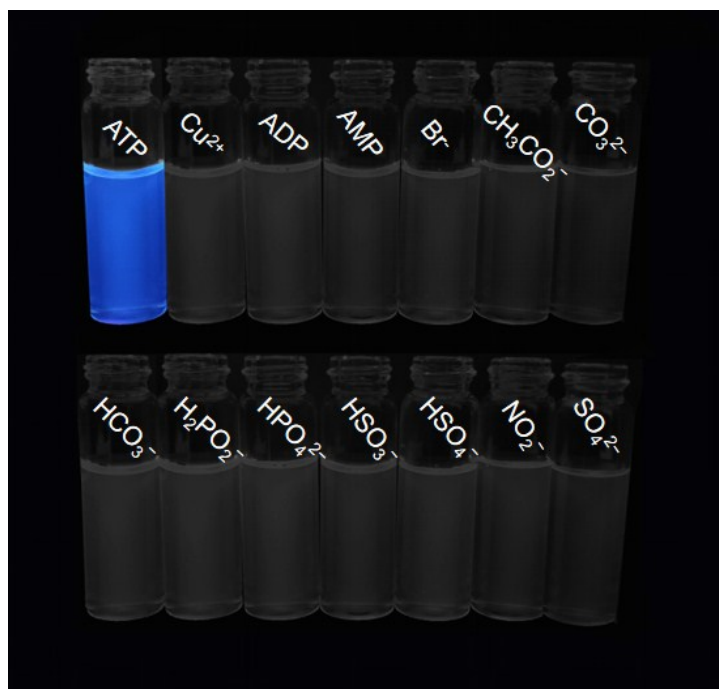

**Fig. S9.** Photos of TPE-COOH/Cu<sup>2+</sup> upon addition of various ions in HEPES buffer. [TPE-COOH/Cu<sup>2+</sup>] = 1.0×10<sup>-5</sup> mol/L; [anion] = 2.0×10<sup>-5</sup> mol/L;  $\lambda_{\text{exc}}$  = 365 nm.
